# Supplementary material for: Co-regulation of intragenic microRNA miR-153 and its host gene Ia-2 β: identification of miR-153 target genes with functions related to IA-2β in pancreas and brain
Source: Springer Nature journal article supplement (doi:10.1007/s00125-013-2901-5), 2013-04-17
Supplement: MOESM1 [file 8091556]

**ESM Fig 1.**

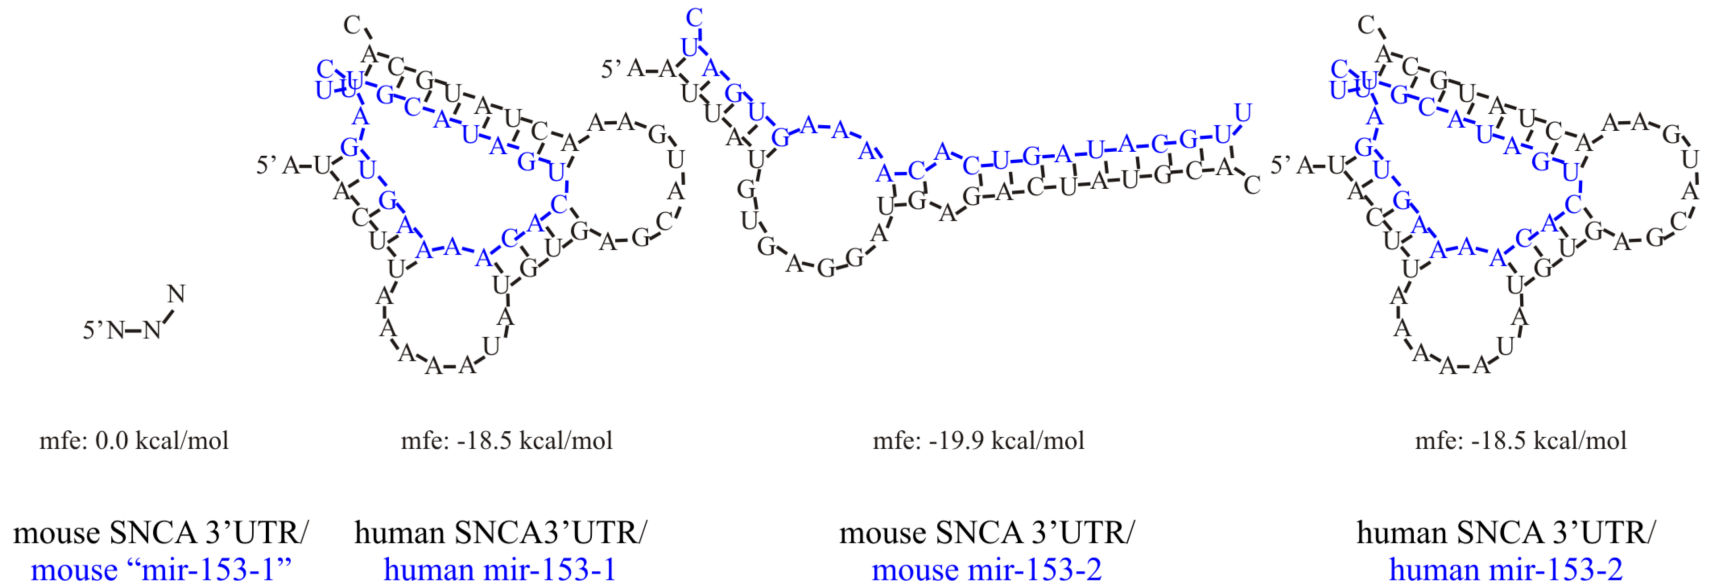

**ESM Fig. 1.** Predicted hybridization of mouse or human SNCA 3'UTR (black) with mouse or human miR-153-1 and miR-153-2 (blue) as determined by the RNAhybrid algorithm [23]. The minimum free energy (mfe) required for the hybridization is indicated.
