# Supplementary material for: Co-regulation of intragenic microRNA miR-153 and its host gene Ia-2 β: identification of miR-153 target genes with functions related to IA-2β in pancreas and brain
Source: Springer Nature journal article supplement (doi:10.1007/s00125-013-2901-5), 2013-04-17
Supplement: MOESM2 [file 8091556]

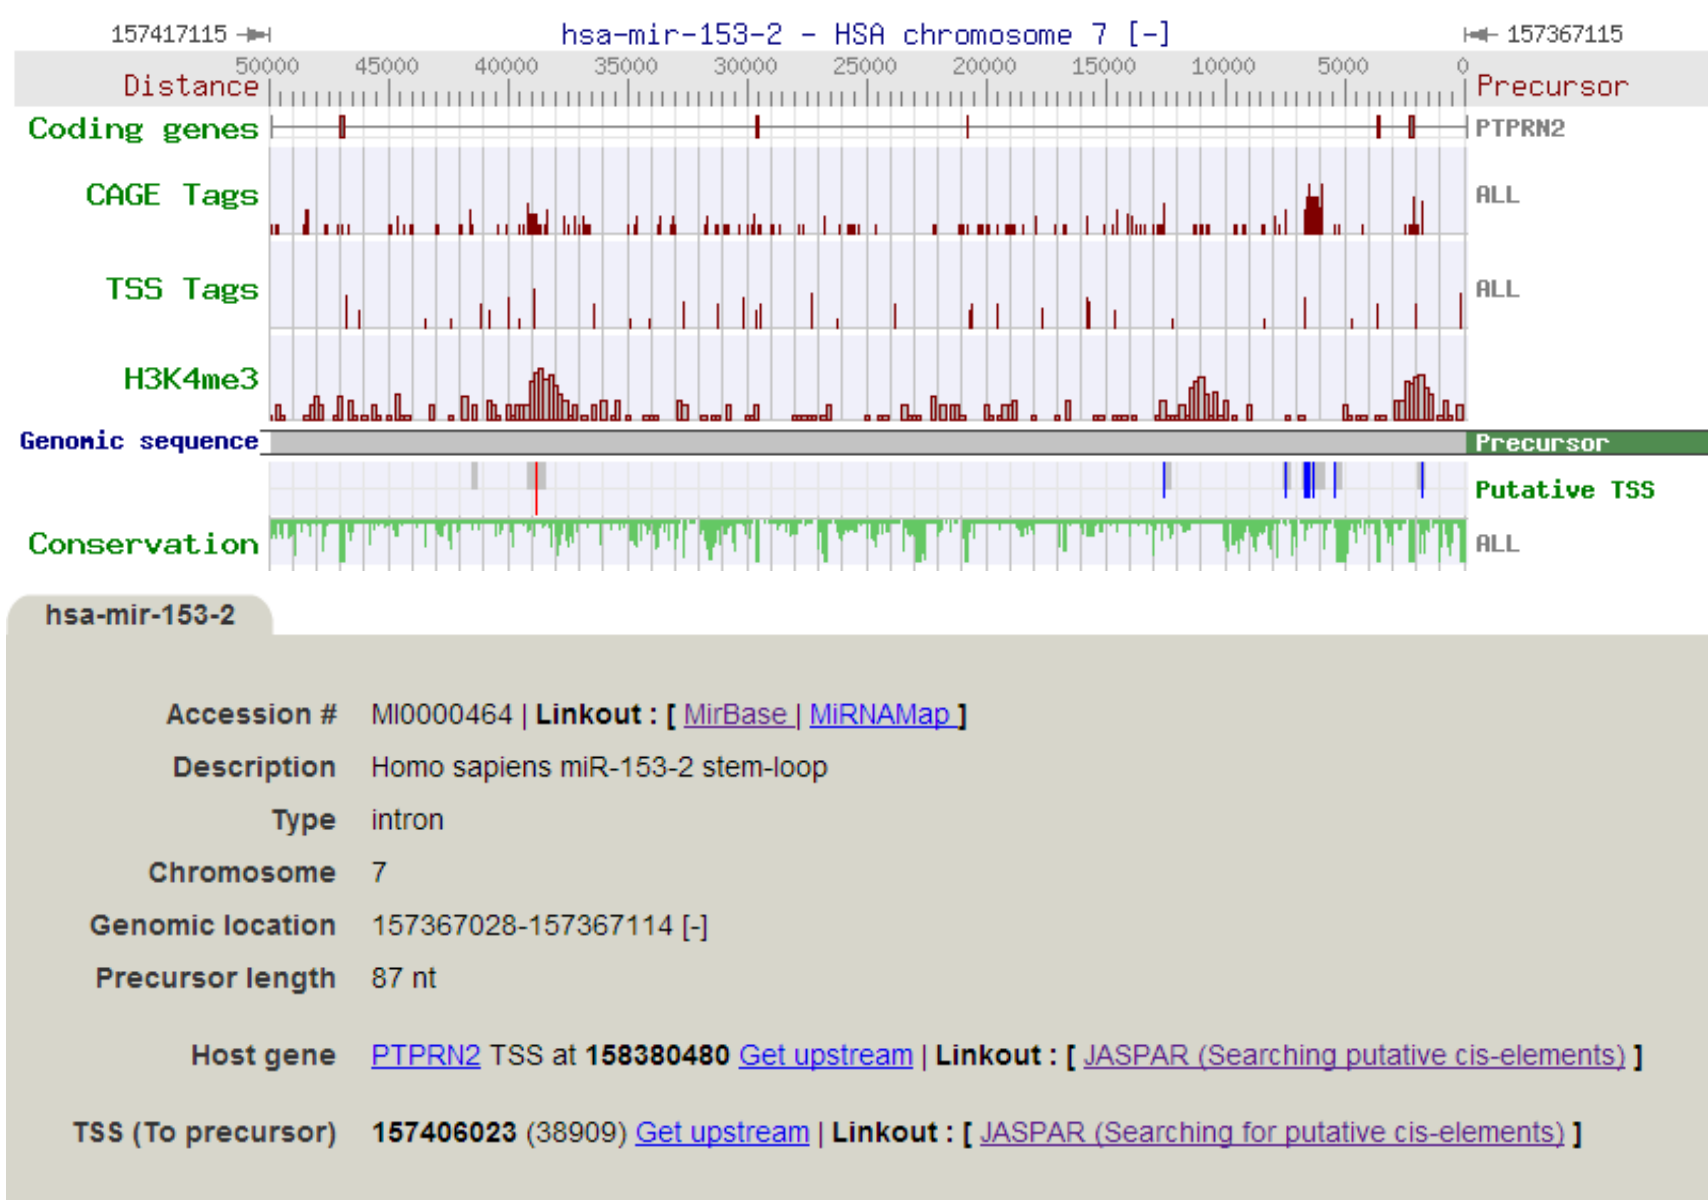

**ESM Fig. 2.** miRStart database analysis of predicted miR-153-2 regulatory sequences within 50kb from upstream region of miR-153-2 precursor. Published experimental evidences used in miRStart are described as follows:(1) CAGE (Cap Analysis of Gene Expression) tags: Recognize 5'-end of a gene. (2) TSS Seq tags: More than 300 million 5'-end sequences of human and mouse cDNAs by combining oligo-capping method and Solexa sequencing technology (3) H3K4me3 enrichment (histone H3 is trimethylated at its lysine 4 residue): Enriched surrounding TSSs. Moreover, ESTs and comparative genomics around putative miRNA TSSs are used to provide strong supports for reconfirmation. A summary is shown of the analysis of the 50kb genomic region upstream of the miR-153-2 precursor. The TSS of miR-153-2 ('TSS (To precursor)') is localised at 38909 bp from the precursor. This is indicated by the red bar in the diagram ('Putative TSS'). More detailed information can be found at <http://mirstart.mbc.nctu.edu.tw/>.
