# Supplementary material for: Co-regulation of intragenic microRNA miR-153 and its host gene Ia-2 β: identification of miR-153 target genes with functions related to IA-2β in pancreas and brain
Source: Springer Nature journal article supplement (doi:10.1007/s00125-013-2901-5), 2013-04-17
Supplement: MOESM4 [file 8091556]

ESM Fig 4.

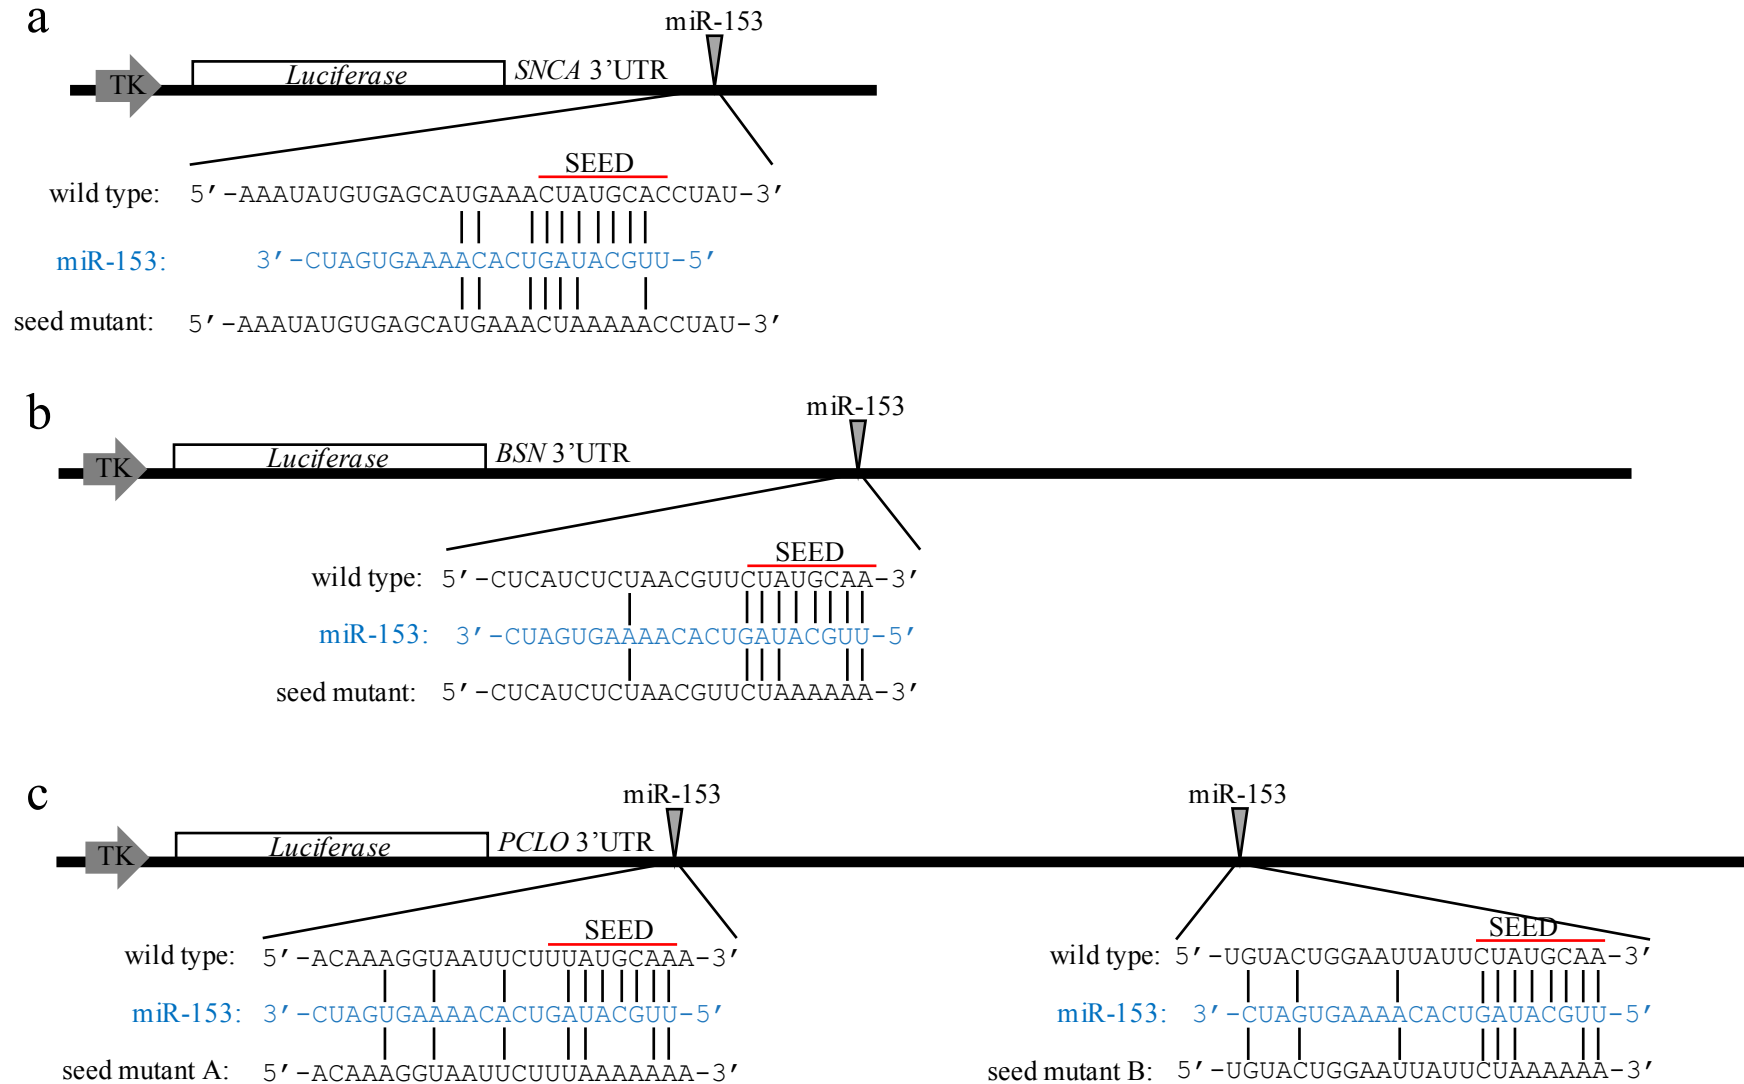

**ESM Fig. 4.** Schematic representation of luciferase expression constructs in which Firefly Luciferase is linked at its 3' end to: **a.** the 3'UTR of Alpha-synuclein (SNCA) (wild type), or a 3'UTR of Alpha-synuclein in which the seed sequence of miR-153 has been mutated (seed mutant). **b.** 3'UTR of BASSOON (BSN) (wild type), or a 3'UTR of BASSOON in which the seed sequence of miR-153 has been mutated (seed mutant). **c.** 3'UTR of PICCOLO (PCLO) (wild type), or a 3'UTR of PICCOLO in which the seed sequence of miR-153 has been mutated (seed mutant). Sequences of the miR-153 seed sequence (wildtype), mutated seed sequence (seed mutant), and miR-153 sequence (blue), and are represented below the diagram.
