# Supplementary material for: Co-regulation of intragenic microRNA miR-153 and its host gene Ia-2 β: identification of miR-153 target genes with functions related to IA-2β in pancreas and brain
Source: Springer Nature journal article supplement (doi:10.1007/s00125-013-2901-5), 2013-04-17
Supplement: MOESM5 [file 8091556]

**ESM Table 1.**

| Predicted miR-153 targets | Targetscan Context+ score | Targetscan aggregate P <sub>CT</sub> | Brain expression/function [reference] | Pancreas expression/function [reference] |
|---------------------------|---------------------------|--------------------------------------|---------------------------------------|------------------------------------------|
| <i>BSN</i>                | -0,05                     | 0.85                                 | [1]                                   | [2]                                      |
| <i>PCLO</i>               | -0,10                     | 0,89                                 | [3]                                   | [4]                                      |
| <i>SNAP25</i>             | -0,14                     | 0,78                                 | [5]                                   | [6]                                      |
| <i>SNCA</i>               | -0,18                     | 0,85                                 | [7]                                   | [8]                                      |
| <i>SYT1</i>               | >-0,02                    | < 0,1                                | [9]                                   | [10]                                     |
| <i>SYT4</i>               | -0,04                     | 0,73                                 | [11]                                  | [12]                                     |
| <i>VAMP2</i>              | -0,26                     | 0.93                                 | [13]                                  | [14]                                     |

**References to ESM Table 1.**

- [1] Altrock WD, tom Dieck S, Sokolov M, et al. (2003) Functional inactivation of a fraction of excitatory synapses in mice deficient for the active zone protein bassoon. *Neuron* 37: 787-800
- [2] Ohara-Imaizumi M, Ohtsuka T, Matsushima S, et al. (2005) ELKS, a protein structurally related to the active zone-associated protein CAST, is expressed in pancreatic beta cells and functions in insulin exocytosis: interaction of ELKS with exocytotic machinery analyzed by total internal reflection fluorescence microscopy. *Mol Biol Cell* 16: 3289-3300
- [3] Mukherjee K, Yang X, Gerber SH, et al. (2010) Piccolo and bassoon maintain synaptic vesicle clustering without directly participating in vesicle exocytosis. *Proc Natl Acad Sci U S A* 107: 6504-6509
- [4] Fujimoto K, Shibasaki T, Yokoi N, et al. (2002) Piccolo, a Ca<sup>2+</sup> sensor in pancreatic beta-cells. Involvement of cAMP-GEFII.Rim2. Piccolo complex in cAMP-dependent exocytosis. *J Biol Chem* 277: 50497-50502
- [5] Blasi J, Chapman ER, Link E, et al. (1993) Botulinum neurotoxin A selectively cleaves the synaptic protein SNAP-25. *Nature* 365: 160-163
- [6] Sadoul K, Lang J, Montecucco C, et al. (1995) SNAP-25 is expressed in islets of Langerhans and is involved in insulin release. *J Cell Biol* 128: 1019-1028
- [7] Nemani VM, Lu W, Berge V, et al. (2010) Increased expression of alpha-synuclein reduces neurotransmitter release by inhibiting synaptic vesicle reclustering after endocytosis. *Neuron* 65: 66-79
- [8] Geng X, Lou H, Wang J, et al. (2011) alpha-Synuclein binds the K(ATP) channel at insulin-secretory granules and inhibits insulin secretion. *Am J Physiol Endocrinol Metab* 300: E276-286
- [9] Geppert M, Goda Y, Hammer RE, et al. (1994) Synaptotagmin I: a major Ca<sup>2+</sup> sensor for transmitter release at a central synapse. *Cell* 79: 717-727
- [10] Lang J, Fukuda M, Zhang H, Mikoshiba K, Wollheim CB (1997) The first C2 domain of synaptotagmin is required for exocytosis of insulin from pancreatic beta-cells: action of synaptotagmin at low micromolar calcium. *Embo J* 16: 5837-5846
- [11] Dean C, Liu H, Dunning FM, Chang PY, Jackson MB, Chapman ER (2009) Synaptotagmin-IV modulates synaptic function and long-term potentiation by regulating BDNF release. *Nat Neurosci* 12: 767-776

[12] Gut A, Kiraly CE, Fukuda M, Mikoshiba K, Wollheim CB, Lang J (2001) Expression and localisation of synaptotagmin isoforms in endocrine beta-cells: their function in insulin exocytosis. *J Cell Sci* 114: 1709-1716

[13] Schoch S, Deak F, Konigstorfer A, et al. (2001) SNARE function analyzed in synaptobrevin/VAMP knockout mice. *Science* 294: 1117-1122

[14] Regazzi R, Wollheim CB, Lang J, et al. (1995) VAMP-2 and cellubrevin are expressed in pancreatic beta-cells and are essential for Ca(2+)-but not for GTP gamma S-induced insulin secretion. *Embo J* 14: 2723-2730

**ESM Table 1. Candidate miR-153 target genes that correlate with IA-2 beta function at sites of IA-2beta expression.** The first column shows the names of the predicted miR-153 targets. Targetscan total context+ scores (looking at the context of the sites within the UTR; the lower the score, the better) and aggregate P<sub>CT</sub> (Probability conserved targeting) preferential conservation of the sites; score between 0 and 1.0; the higher the score, the better) are shown in the second and third column, respectively. References that demonstrated correlation between expression and/or function of IA-2beta and target genes in brain and pancreas are shown in the fourth and fifth column, respectively. The list of relevant references is shown below the table.
